# Supplementary material for: Efficient visible-light photocatalytic heterojunctions formed by coupling plasmonic Cu2−xSe and graphitic carbon nitride
Source: Royal Society of Chemistry journal article supplement (doi:10.1039/c5nj01010a), 2015-01-01
Supplement: c5nj01010a1.pdf [file c5nj01010a1.pdf]

## Electronic Supporting Information

*for*

# Efficient Visible-Light Photocatalytic Heterojunctions Coupled by Plasmonic Cu<sub>2-x</sub>Se and Graphitic Carbon Nitride

Jing Han,<sup>ab</sup> Hong Yan Zou,<sup>ab</sup> Ze Xi Liu,<sup>a</sup> Tong Yang,<sup>b</sup> Ming Xuan Gao<sup>b</sup> and Cheng Zhi Huang,<sup>ab</sup>

<sup>a</sup>Key Laboratory of Luminescence and Real-Time Analytical Chemistry (Southwest University), Ministry of Education, College of Pharmaceutical Science, Southwest University, Chongqing, 400715, P. R. China. E-mail: chengzhi@swu.edu.cn, Tel: (+86) 23 68254659, Fax: (+86) 23 68367257.

<sup>b</sup>College of Chemistry and Chemical Engineering, Southwest University C, Chongqing 400716, China

## 1. Experimental section

### Characterization

Scanning electron microscopy (SEM) and Energy-dispersive X-ray spectroscopy (EDS) was performed with an S-4800 scanning electron microscope (Hitachi, Japan). Transmission electron microscopy (TEM) measurements were obtained from a Tecnai G2 F20 S-TWIN microscopy (FEI, USA). The X-ray photoelectron spectroscopy (XPS) analysis was conducted by an ESCALAB 250 X-ray photoelectron spectrometer (Thermo, USA). The samples for XPS were made by the deposition of a nanocrystal suspension in water on Si substrate. A Fourier transform infrared (FT-IR) spectrophotometer (FTIR-8400S, Shimadzu, Japan) was employed to measuring the FT-IR spectrum. UV-vis-NIR absorption spectra were obtained using a Hitachi U-3600 spectrophotometer. Steady-state fluorescence spectra and fluorescence anisotropy were measured with an F-2500 fluorescence spectrophotometer (Hitachi, Japan) with the nanoparticles dispersed in reagents.

## 2. Results and discussion

## 2.1 Structure and property analysis

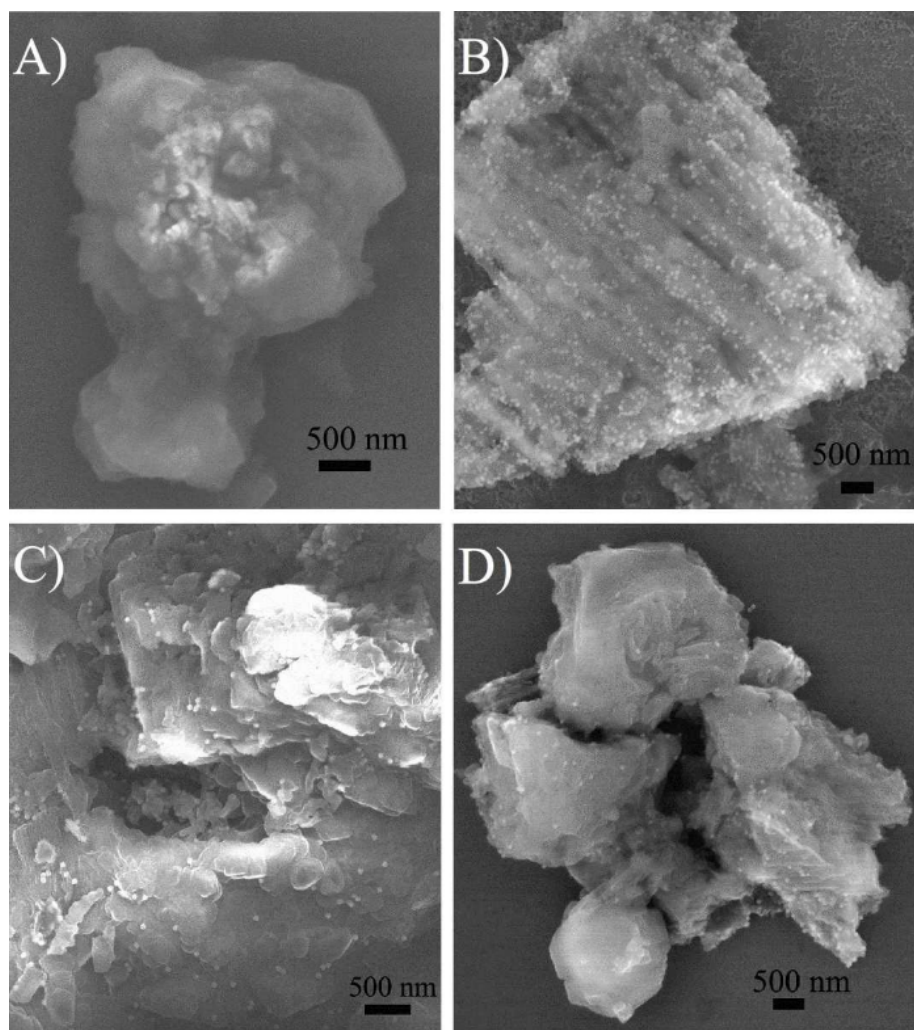

Fig. S1 SEM images of g-C<sub>3</sub>N<sub>4</sub> (A), 60 wt% Cu<sub>2-x</sub>Se/g-C<sub>3</sub>N<sub>4</sub> (B), 40 wt% Cu<sub>2-x</sub>Se/g-C<sub>3</sub>N<sub>4</sub> (C) and 20 wt% Cu<sub>2-x</sub>Se/g-C<sub>3</sub>N<sub>4</sub> (D).

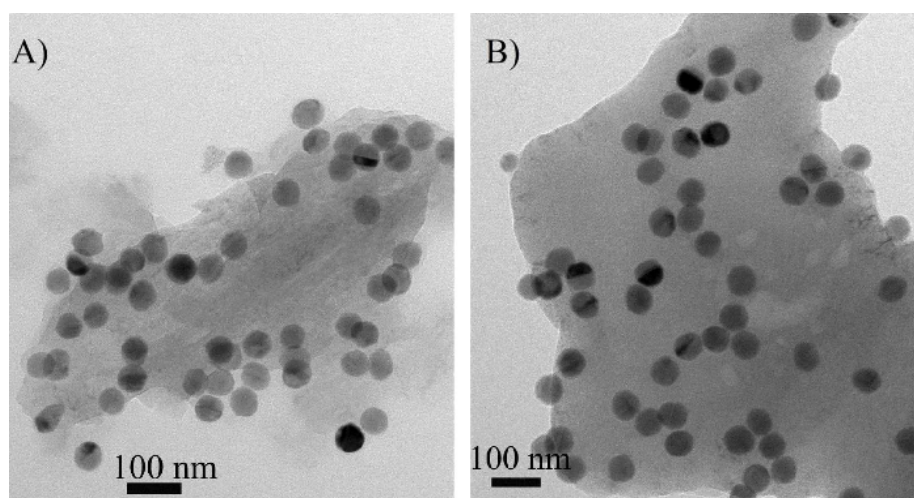

Fig. S2 TEM images of 40 wt% Cu<sub>2-x</sub>Se/g-C<sub>3</sub>N<sub>4</sub> (A) and 20 wt% Cu<sub>2-x</sub>Se/g-C<sub>3</sub>N<sub>4</sub> (B).

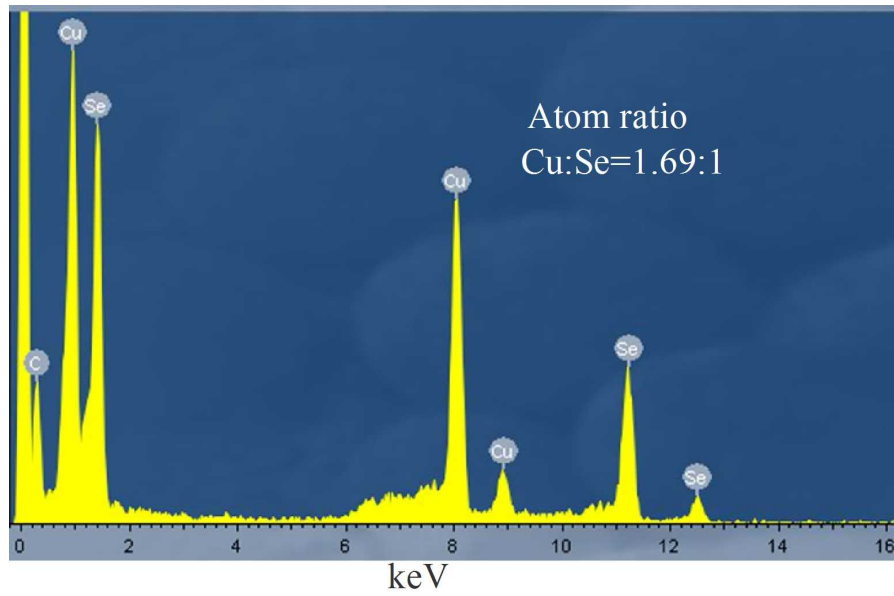

Fig.S3 EDS image of the  $\text{Cu}_{2-x}\text{Se}$ .

### Calculation of band gap energy

The band gap energies of semiconductors can be estimated by Kubelka–Munk transformation,<sup>1</sup>

$$\alpha h\nu = A(h\nu - E_g)^2 \quad (1)$$

Where  $\alpha$  represents the absorption coefficient,  $\nu$  is the light frequency,  $E_g$  is the band gap energy,  $A$  is a constant and  $n$  depends on the characteristics of the transition in a semiconductor. For  $\text{Cu}_{2-x}\text{Se}$  and  $\text{g-C}_3\text{N}_4$ , the value of  $n$  is 4 for the indirect transition. Thus, as shown in Figure 5 (inset), the band gap energies of  $\text{Cu}_{2-x}\text{Se}$  and  $\text{g-C}_3\text{N}_4$  is 1.35 eV and 2.64 eV, respectively.

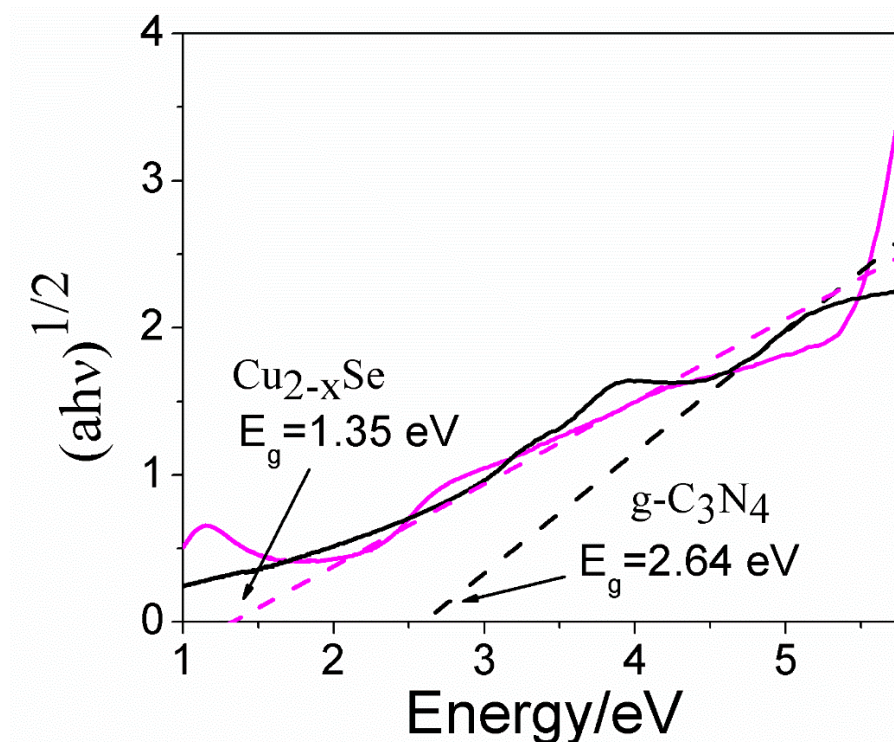

Fig. S4 The band-gap energy of  $\text{Cu}_{2-x}\text{Se}$  and  $\text{g-C}_3\text{N}_4$

## 2.2 Photocatalytic Performances

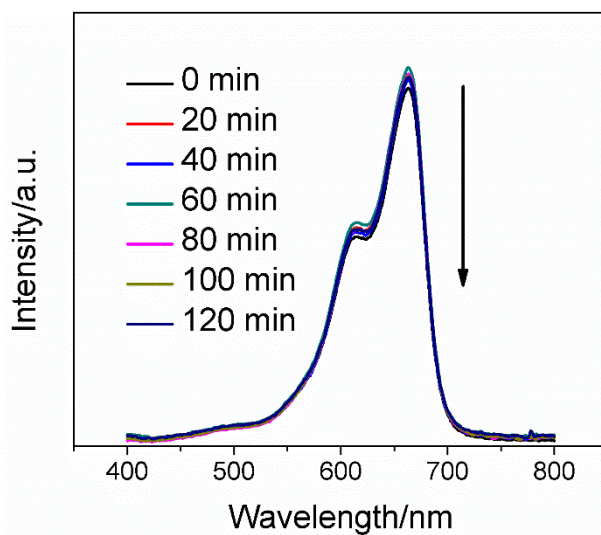

Fig. S5 The UV-vis spectra change during the MB photodegradation without photocatalysts

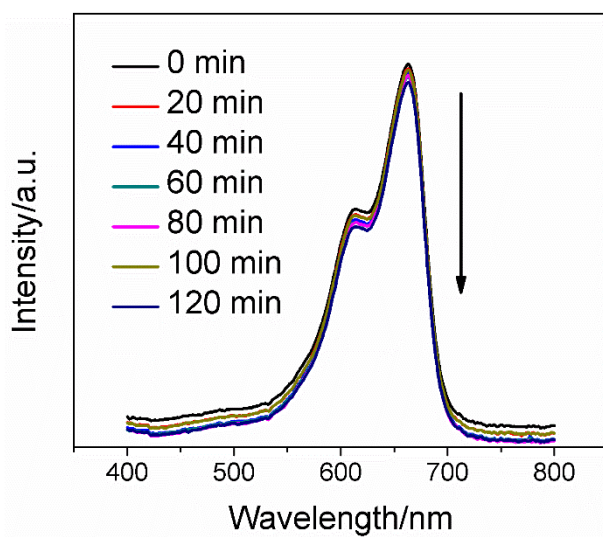

Fig. S6 The UV-vis spectra change during the MB photodegradation by 12 mg 60 wt%  $\text{Cu}_{2-x}\text{Se}/\text{g-C}_3\text{N}_4$  photocatalysts without light.

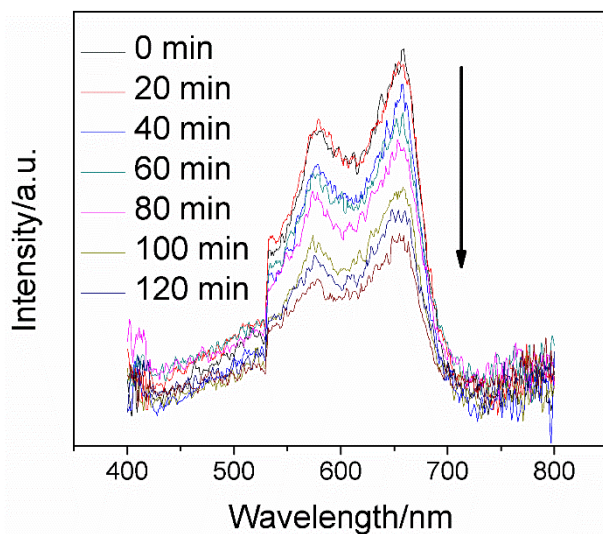

Fig. S7 The UV-vis spectra change during the MB photodegradation by 12 mg  $\text{Cu}_{2-x}\text{Se}$  under visible-light irradiation.

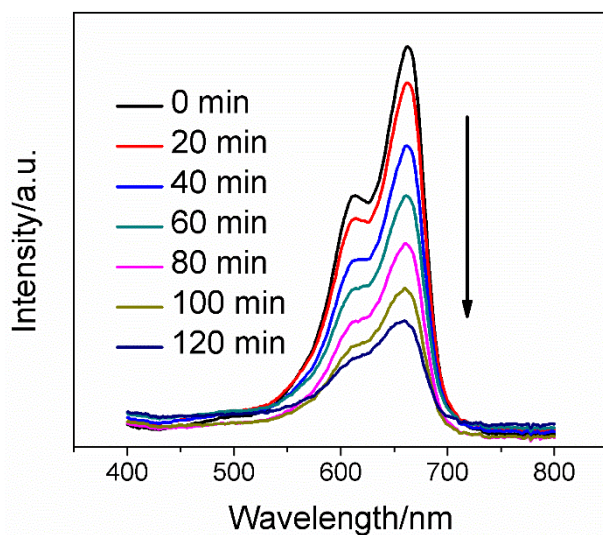

Fig. S8 The UV-vis spectra change during the MB photodegradation by 12 mg g-C<sub>3</sub>N<sub>4</sub> under visible-light irradiation.

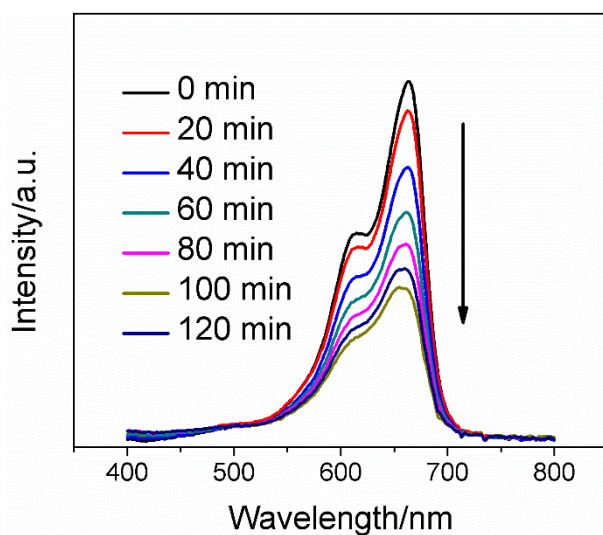

Fig. S9 The UV-vis spectra change during the MB photodegradation by 12 mg mechanical mixtures of Cu<sub>2-x</sub>Se and g-C<sub>3</sub>N<sub>4</sub> with the mass ratio of 3:2 under visible-light irradiation.



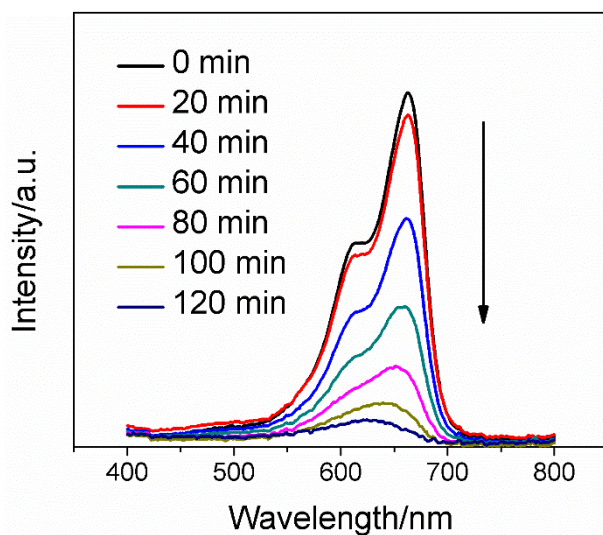

Fig. S10 The UV-vis spectra change during the MB photodegradation by 12 mg 60 wt% Cu<sub>2-x</sub>Se/g-C<sub>3</sub>N<sub>4</sub> heterojunctions under visible-light irradiation.

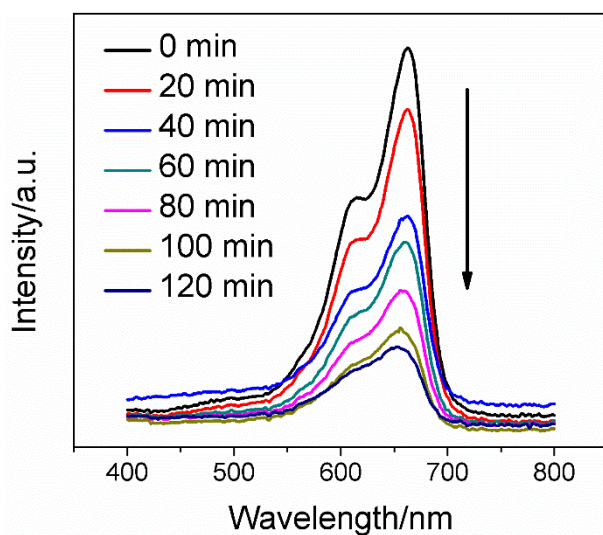

Fig. S11 The UV-vis spectra change during the MB photodegradation by 12 mg 40 wt% Cu<sub>2-x</sub>Se/g-C<sub>3</sub>N<sub>4</sub> heterojunctions under visible-light irradiation.

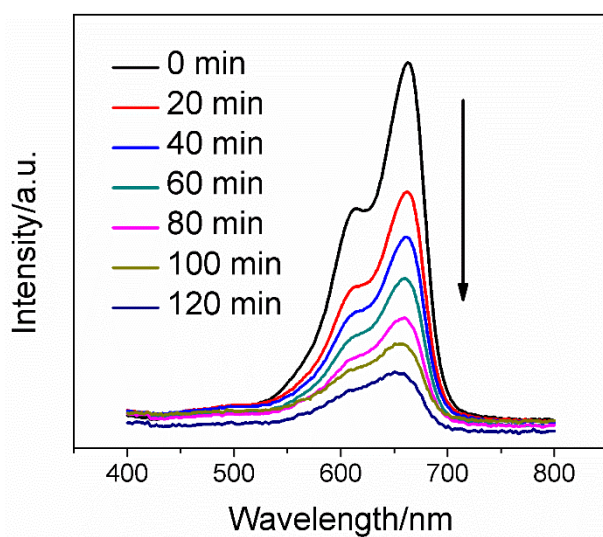

Fig. S12 The UV–vis spectra change during the MB photodegradation by 12 mg 20 wt%  $\text{Cu}_{2-x}\text{Se}/\text{g-C}_3\text{N}_4$  heterojunctions under visible-light irradiation.

**Table S1.** Surface and Photocatalytic Characterization of  $\text{Cu}_{2-x}\text{Se}/\text{g-C}_3\text{N}_4$  Heterojunctions

| Sample                     | BET ( $\text{m}^2/\text{g}$ ) | $k$ ( $\text{min}^{-1}$ ) |
|----------------------------|-------------------------------|---------------------------|
| No Light                   | /                             | 0.00023                   |
| $\text{Cu}_{2-x}\text{Se}$ | /                             | 0.00455                   |
| $\text{C}_3\text{N}_4$     | 5.68                          | 0.00998                   |
| Mechanical mixtures        | /                             | 0.00732                   |
| 20 wt%                     | 9.38                          | 0.011                     |
| 40 wt%                     | 5.56                          | 0.01234                   |
| 60 wt%                     | 6.29                          | 0.0276                    |



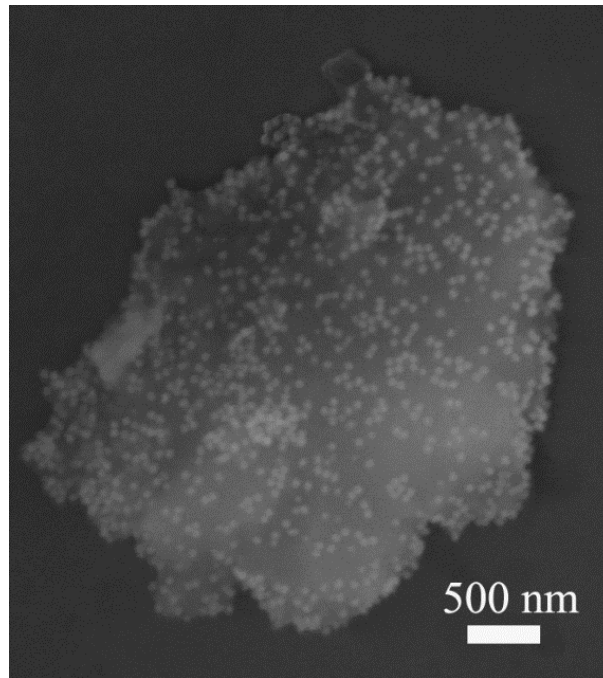

Fig. S13 The SEM image of 60 wt%  $\text{Cu}_{2-x}\text{Se}/\text{g-C}_3\text{N}_4$  recycled used for three times in the same photocatalytic process.

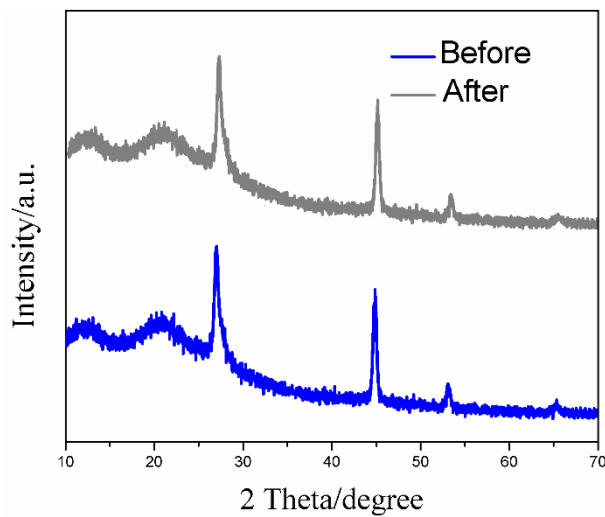

Fig. S14 The XRD of 60 wt%  $\text{Cu}_{2-x}\text{Se}/\text{g-C}_3\text{N}_4$  before and after three cycles in the photocatalytic process.

## References

- 1 J. Tauc, *Mater. Res. Bull.*, 1970, **5**, 721.
